# Supplementary material for: AMP-activated protein kinase modulates tau phosphorylation and tau pathology in vivo
Source: PubMed Central journal article supplement (PMC4882625; doi:10.1038/srep26758), 2016-05-27

**Title:**

AMP-activated protein kinase modulates tau phosphorylation and tau pathology *in vivo*

**Authors:**

Manon Domise<sup>1</sup>, Sébastien Didier<sup>1</sup>, Claudia Marinangeli<sup>1</sup>, Haitian Zhao<sup>2</sup>, Pallavi Chandakkar<sup>2</sup>, Luc Buée<sup>1</sup>, Benoit Viollet<sup>3,4,5</sup>, Peter Davies<sup>2</sup>, Philippe Marambaud<sup>2</sup>, Valérie Vingtdeux<sup>1\*</sup>

### **Figure S1. p-Thr<sup>172</sup>AMPK staining specificity**

**a.** Primary neurons at 15 DIV were treated with the AMPK activator AICAR (1mM, 6 h) and labeled with p-Thr<sup>172</sup>AMPK (pAMPK) antibody using identical acquisition settings. **b.** Immunofluorescence staining of p-Thr<sup>172</sup>AMPK without (top) or with (bottom) p-Thr<sup>172</sup>AMPK blocking peptide in primary neurons at DIV 15 using identical acquisition settings. Scale bars = 50  $\mu$ m.

### **Figure S2. Metformin-mediated AMPK activation induces tau phosphorylation in primary neurons**

Primary neurons at 15 DIV were treated for the indicated times with metformin (2.5 mM). AMPK and ACC expression and activation were monitored by WB using antibodies against AMPK, p-Thr<sup>172</sup>AMPK (pAMPK), ACC, p-Ser<sup>79</sup>ACC (pACC) and actin (**a**). Quantifications of the ratios AMPK/actin (**b**) pAMPK/AMPK (**c**) and pACC/ACC (**d**). WB analysis (**e**) and quantification of total tau (**f**) and phosphorylated tau at epitopes Ser<sup>262/356</sup> (**g**), Thr<sup>231</sup> (**h**), Ser<sup>396/404</sup> (**i**) and Ser<sup>202</sup> (**j**) expressed in ratios. LDH cytotoxicity assay following 6 h and 24 h metformin treatments (**k**). Results represent mean  $\pm$  SD, n=4-6. a.u., arbitrary units. \* p<0.05, \*\* p<0.01, \*\*\* p<0.001 compared to Ctrl, One way ANOVA with Bonferroni's post hoc test.

### **Figure S3. Western-blot analysis of tau in heat-stable, soluble and insoluble fractions**

WB analysis of total tau and phosphorylated tau at epitopes Thr<sup>231</sup>, Ser<sup>396/404</sup> and Ser<sup>202</sup> in heat stable (**a**), soluble (**b**), and insoluble (**c**) fractions of 8-months old AMPK $\alpha$ 2<sup>+/+</sup>:tau<sup>P301S</sup> (Tg) and AMPK $\alpha$ 2<sup>-/-</sup>:tau<sup>P301S</sup> (Tg x  $\alpha$ 2 KO) mouse brains.

**Figure S1**

**a**

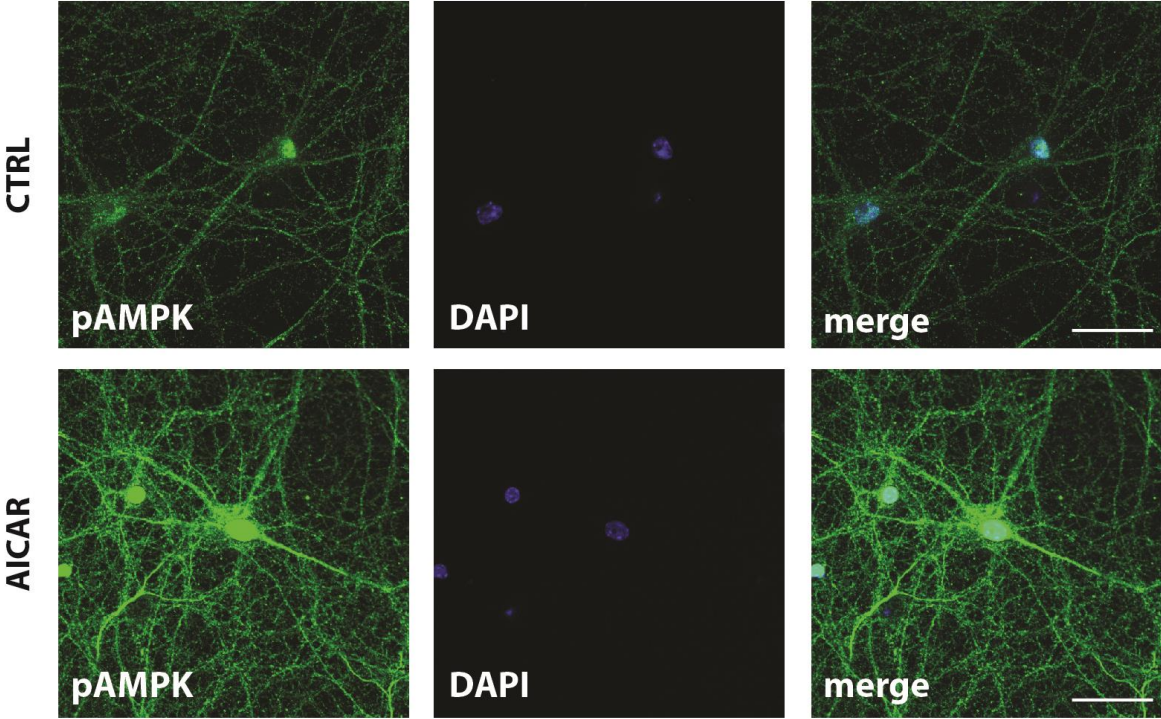

**b**

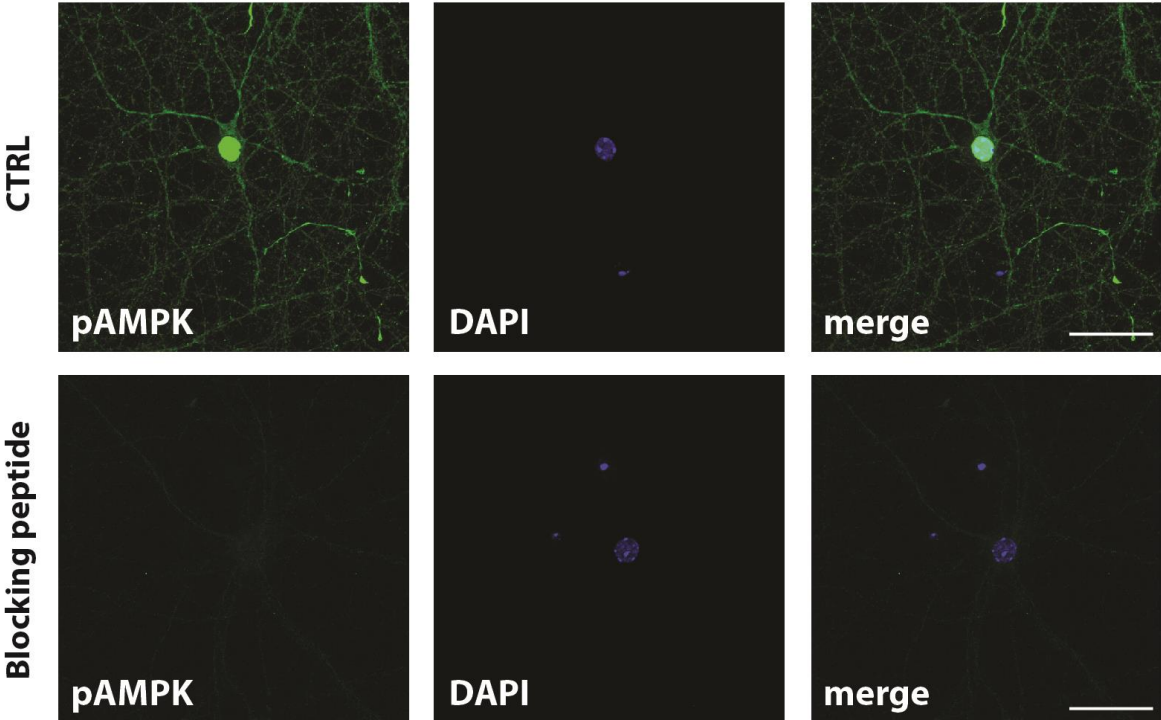

**Figure S2**

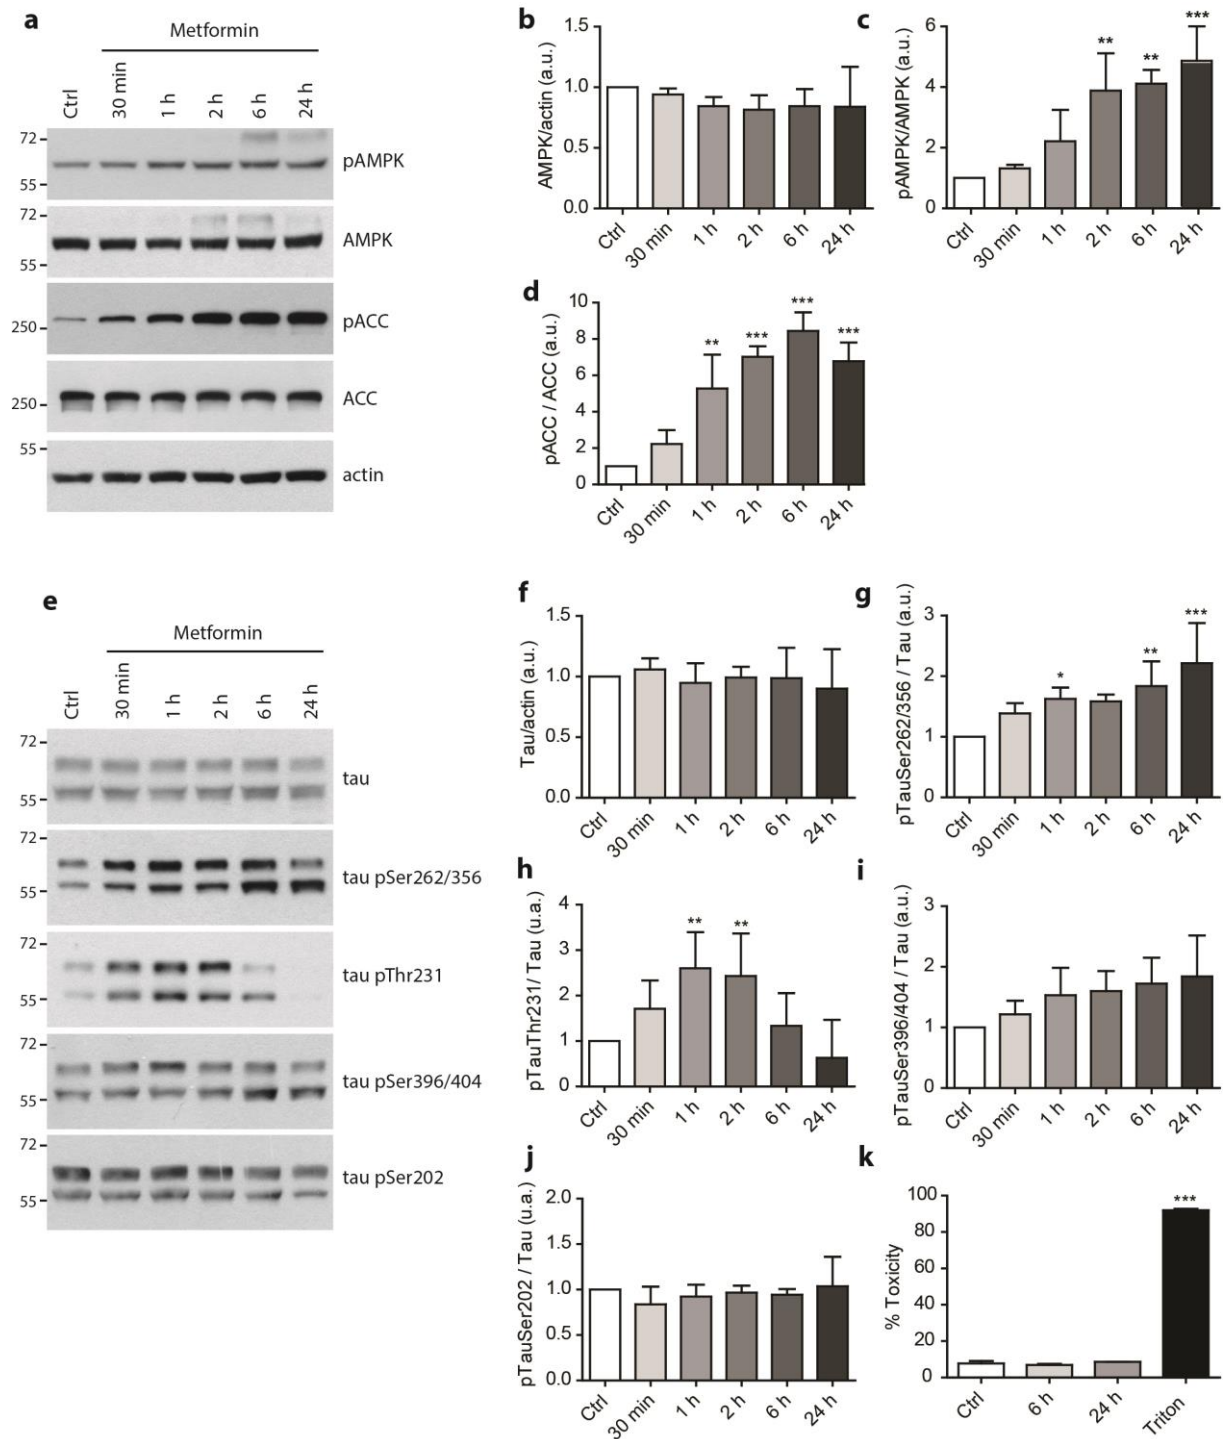

**Figure S3**

**a**

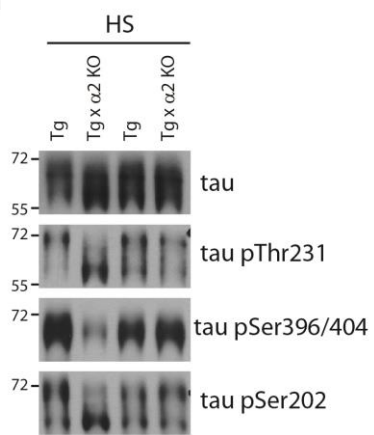

**b**

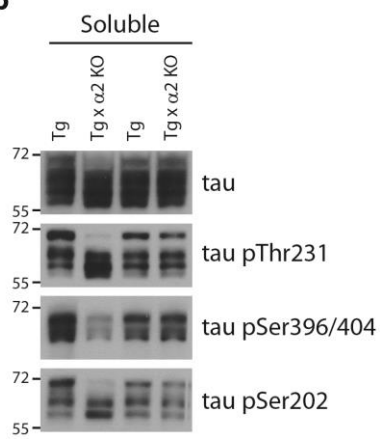

**c**

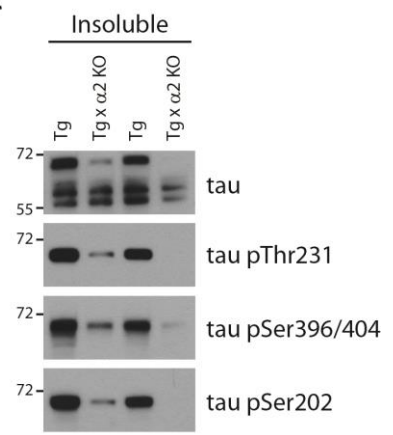

Supplement: srep26758-s1.pdf [file srep26758-s1.pdf]
